# Supplementary material for: Bub1, Sgo1, and Mps1 mediate a distinct pathway for chromosome biorientation in budding yeast
Source: PubMed Central journal article supplement — Mol Biol Cell. 2011 May 1;22(9):1473–85. doi: 10.1091/mbc.E10-08-0673 (PMC3084670; doi:10.1091/mbc.e10-08-0673), 2011-05-01
Supplement: E10-08-0673_1.pdf [file E10-08-0673_1.pdf]

## Supplementary figure legend

### Supplementary Fig. 1

The localization of Sgo1-GFP to pre-anaphase spindles is abolished in cells lacking the kinase domain of Bub1. An Spc29-RFP fusion construct was used to visualize the spindle poles. The series of images in the lower panel were captured by live-cell imaging and show the spindle recruitment and subsequent removal of Sgo1-GFP over the course of a single mitosis.

### Supplementary Fig. 2

**A.** *IPL1* over-expression cannot rescue the growth defect of *sgo1Δ* or *bub1Δ* tetraploids. **B.** Alleles of *BIR1* that code for a mutant protein unable to interact with Sli15 (*BIR1*<sup>901</sup>) or unable to interact with both Sli15 and Ipl1 (*BIR1*<sup>931,935</sup>) cannot suppress the growth defect of tetraploids lacking either *BUB1* or *SGO1*.

### Supplementary Fig. 3

**A.** Tetraploid cells lacking *SGO1* do not exhibit defects in sister-chromatid cohesion during mitosis, in agreement with previous results in haploid cells. We used tetraploid cells expressing TetR-GFP and marked a single centromere by introducing a TetO array at chromosome IV. Cells were arrested in G1 and in metaphase (M) and scored for the number of distinct GFP foci. **B.** A mutant Sgo1 protein containing isoleucine instead of arginine in position 51 no longer interacts with the phosphatase PP2A, but it can still partially restore the viability of the *sgo1Δ* tetraploids.

### Supplementary Fig. 4

**A.** The benomyl-sensitivity of cells lacking Cdc55 (a regulatory subunit of the phosphatase PP2A) cannot be suppressed by the over-expression of *BIR1* or *SLI15*. **B.** Cdc55 is not required for the ability of over-expressed *SGO1* to suppress the benomyl sensitivity of haploid *bub1Δ* cells.

### Supplementary Fig. 5

**A.** Over-expression of *MPS1* on a 2-micron plasmid partially rescues the growth defect of *sgo1Δ* tetraploids. **B.** Over-expression of *MPS1* on a 2-micron plasmid partially rescues the sensitivity of *sgo1Δ* haploid to benomyl. **C.** Over-expression of *MPS1* rescues the benomyl sensitivity of the checkpoint-competent haploid strain *bub1ΔK* (lacking the kinase domain) but not the checkpoint-deficient strain *bub1Δ*.

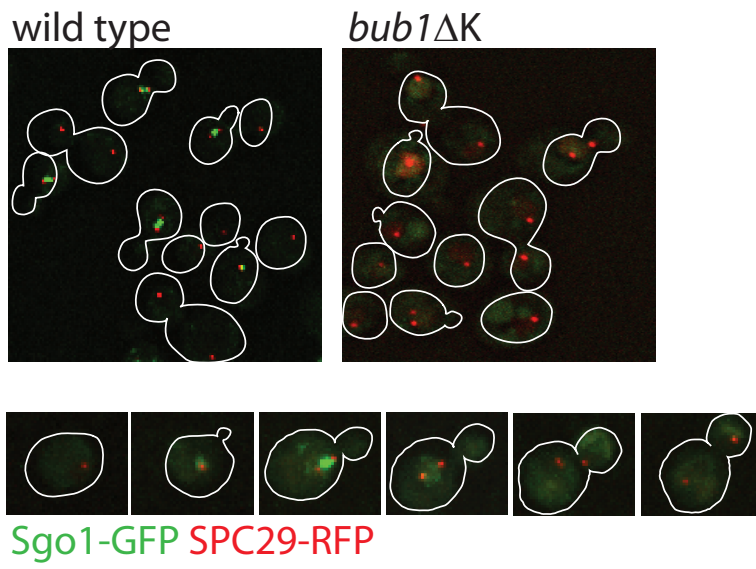

Supplementary Figure 1, Storchova, Becker et al.

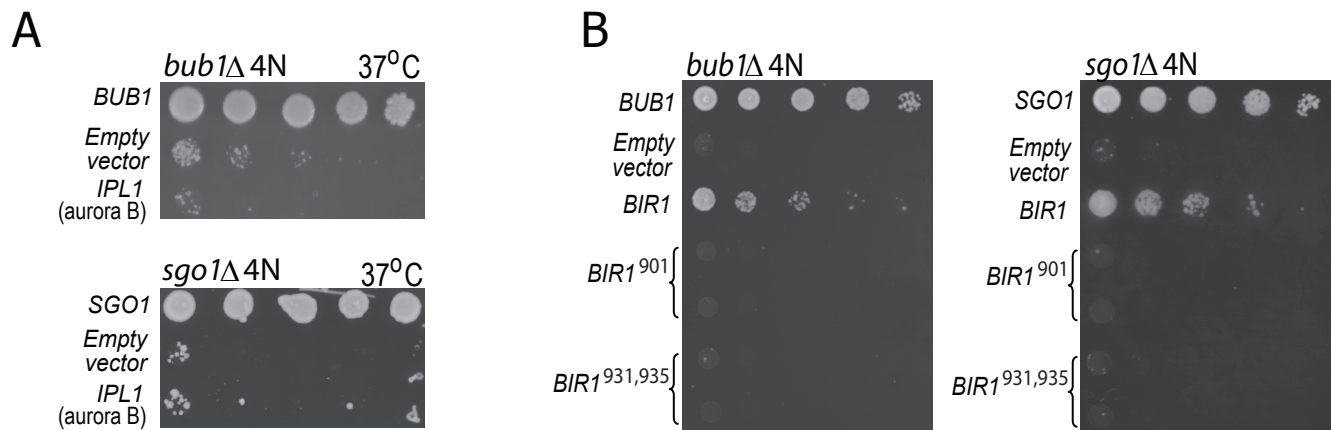

Supplementary Figure 2, Storchova, Becker et al.

**A**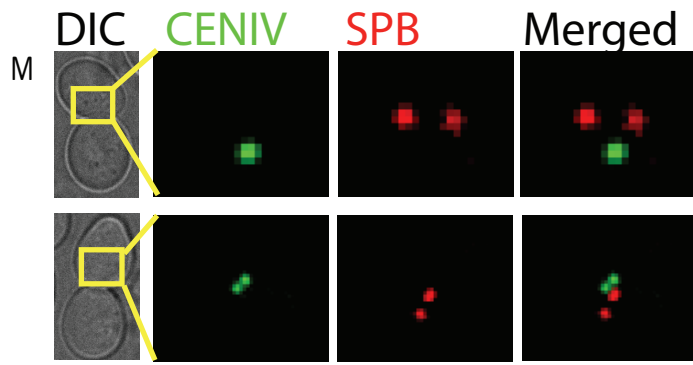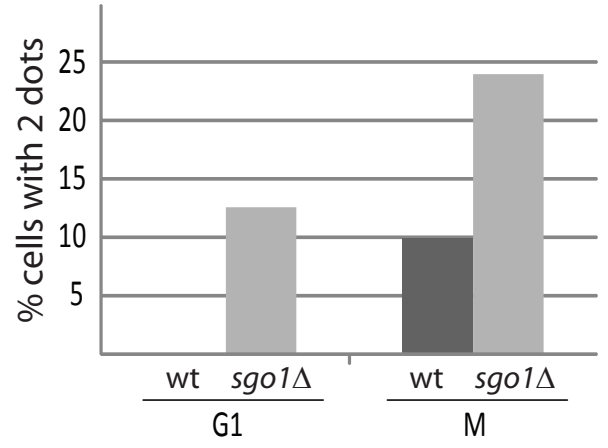**B**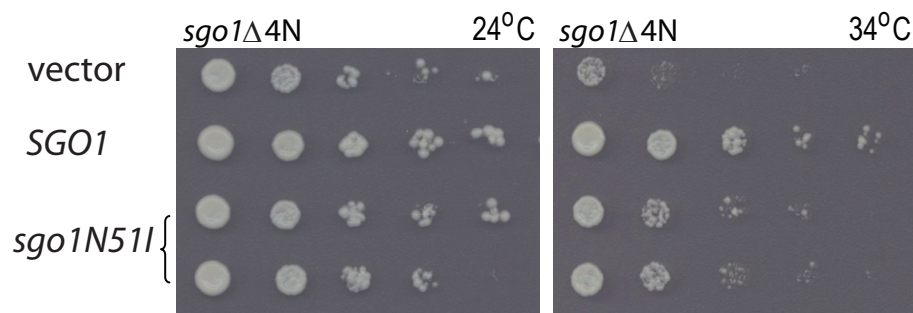

**A**

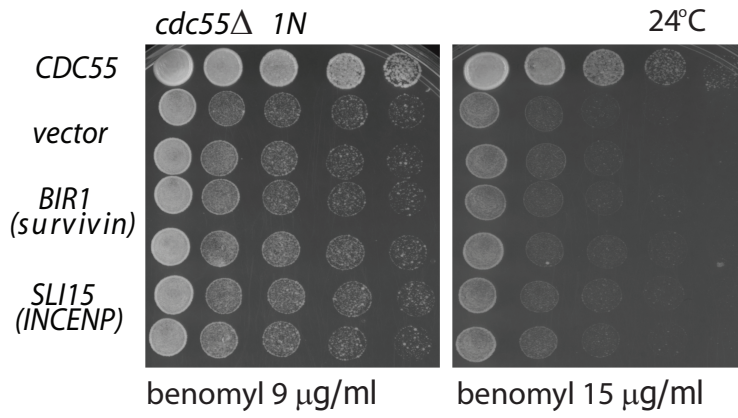

**B**

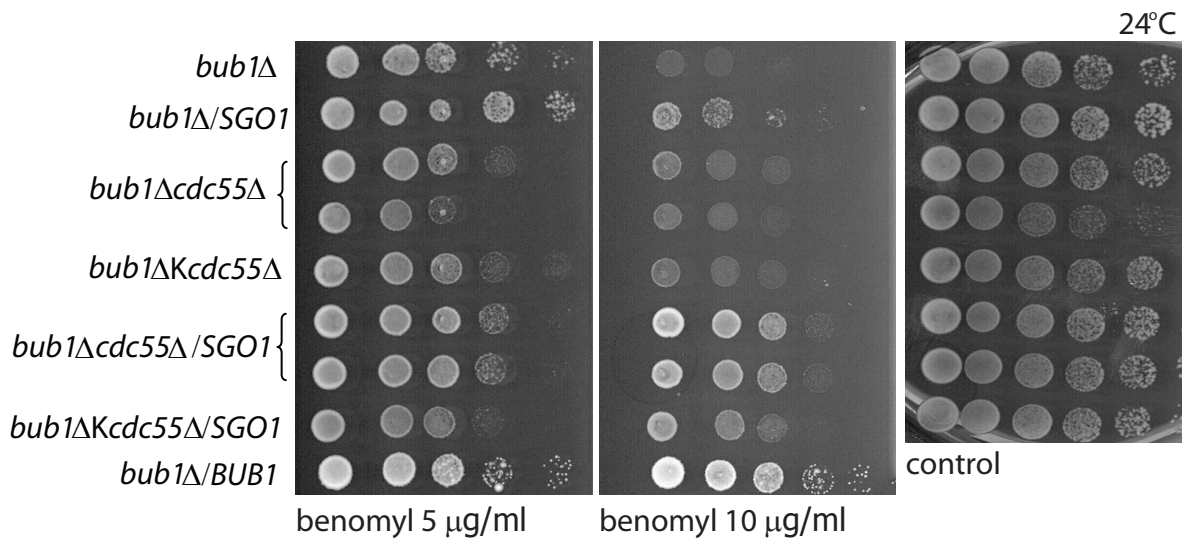

**A**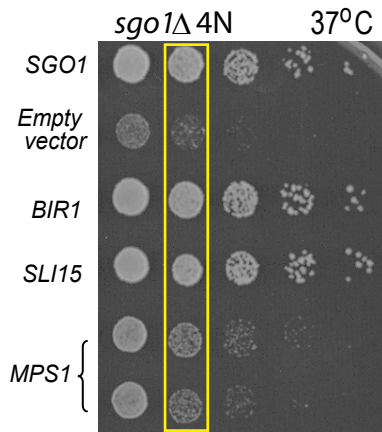**B**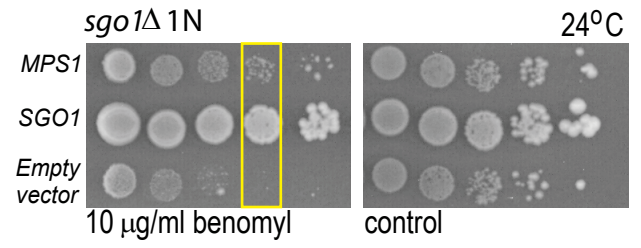**C**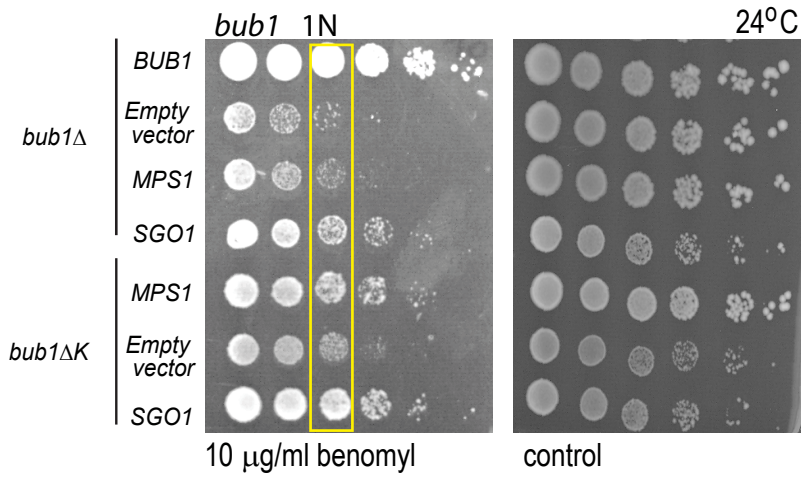

Supplementary Figure 5, Storchova, Becker et al.
